# Supplementary material for: Mitigating a TDP-43 proteinopathy by targeting ataxin-2 using RNA-targeting CRISPR effector proteins
Source: PubMed Central journal article supplement (PMC10576788; doi:10.1038/s41467-023-42147-z), 2023-10-14
Supplement: 41467_2023_42147_MOESM3_ESM.pdf [file 41467_2023_42147_MOESM3_ESM.pdf]

**Title: Supplementary Data 1.**

**Description:** Processed RNA-seq data.

**Title: Supplementary Data 2.**

**Description:** Gene ontology (GO) and biological process (BP) term analysis of DEGs for RfxCas13d, HiFi-RfxCas13d and DiCas7-11.

**Title: Supplementary Data 3.**

**Description:** Gene ontology (GO) and biological process (BP) term analysis of up-regulated DEGs for RfxCas13d, HiFi-RfxCas13d and DiCas7-11.

**Title: Supplementary Data 4.**

**Description:** Gene ontology (GO) and biological process (BP) term analysis of down-regulated DEGs for RfxCas13d, HiFi-RfxCas13d and DiCas7-11.

**Title: Supplementary Data 5.**

**Description:** List of DEGs and overlapping DEGs between RfxCas13d, HiFi-RfxCas13d and DiCas7-11.

**Title: Supplementary Data 6.**

**Description:** Gene ontology (GO) and biological process (BP) term analysis of overlapping DEGs between RfxCas13d, HiFi-RfxCas13d and DiCas7-11.
